# Supplementary material for: Episodic Neurological Dysfunction in X-Linked Charcot-Marie-Tooth Disease: Expansion of the Phenotypic and Genetic Spectrum
Source: PubMed Central journal article supplement — J Clin Neurol. 2024 Jan 1;20(1):59–66. doi: 10.3988/jcn.2023.0104 (PMC10782082; doi:10.3988/jcn.2023.0104), 2024-01-01
Supplement: jcn-20-59-s001.pdf [file jcn-20-59-s001.pdf]

**Supplementary Table 1.** Clinical features of each Charcot-Marie-Tooth disease type 1 patients with *GJB1* variants

| Family individual no. | Sex/ age (y) | AAO (y) | Family history | Initial symptoms                   | Muscle atrophy (UL/LL) | Sensory deficit (UL/LL) | Pes cavus | CNS manifestation                           | CMAP (mV) | MNCV (m/sec) | SNAP (uV) | SNCV (m/sec) | CMTNS | <i>GJB1</i> mutation             | ACMG classification |
|-----------------------|--------------|---------|----------------|------------------------------------|------------------------|-------------------------|-----------|---------------------------------------------|-----------|--------------|-----------|--------------|-------|----------------------------------|---------------------|
| F1-II:1               | M/34         | 33      | +              | Gait abnormality                   | ++/++                  | --/--                   | -         | -                                           | 0.9       | 39.1         | Absent    | Absent       | 11    | c.9G>A (p. Trp3*)                | P                   |
| F2-III:5              | M/32         | 30      | +              | Weakness in legs                   | ++/++                  | --/++                   | +         | -                                           | ND        | ND           | ND        | ND           | NA    | c.29T>C (p.Leu10Pro)             | LP                  |
| F3-III:3              | M/38         | 11      | -              | Weakness in legs                   | ++/++                  | --/++                   | -         | -                                           | 4.9       | 53.2         | 3.5       | 44.4         | 18    | c.30C>T (p.Leu10Leu)             | VUS                 |
| F4-II:1               | M/14         | 10      | +              | Paroxysmal aphasia, limbs weakness | ++/++                  | --/++                   | -         | Episodic dysphasia, WM lesions              | 2.1       | 38.0         | 2.9       | 40.0         | 13    | c.59T>C (p.Ile20Thr)             | LP                  |
| F4-I:2                | F/38         | NA      | +              | None                               | --/--                  | --/--                   | +         | -                                           | ND        | ND           | ND        | ND           | NA    | c.59T>C (p.Ile20Thr)             | LP                  |
| F5-II:1               | F/36         | 31      | +              | Weakness in legs                   | ++/++                  | --/--                   | +         | -                                           | 2.4       | 34.9         | 3.4       | 35.9         | 11    | c.207C>A (p.Phe69Leu)            | LP                  |
| F6-III:2              | M/43         | 10      | +              | Frequent falls, limbs weakness     | ++/++                  | ++/++                   | +         | -                                           | 1.6       | 37.2         | 9.4       | 38.7         | 14    | c.224G>A (p.Arg75Gln)            | P                   |
| F7-III:3              | M/17         | 14      | +              | Gait difficulty                    | --/--                  | --/++                   | +         | Abnormal BAEPs                              | 5.2       | 34.5         | 3.6       | 40.6         | 15    | c.379A>T (p.Ile127Phe)           | P                   |
| F7-III:4              | M/10         | 7       | +              | Slender limbs                      | ++/++                  | --/--                   | +         | -                                           | 7.2       | 41.7         | 7.1       | 41.7         | 4     | c.379A>T (p.Ile127Phe)           | P                   |
| F7-II:8               | F/34         | NA      | +              | None                               | --/--                  | --/--                   | +         | -                                           | 3.6       | 35.7         | Absent    | Absent       | 6     | c.379A>T (p.Ile127Phe)           | P                   |
| F7-II:6               | M/42         | 38      | +              | Weakness in legs                   | --/++                  | --/++                   | +         | -                                           | ND        | ND           | ND        | ND           | NA    | c.379A>T (p.Ile127Phe)           | P                   |
| F7-II:4               | M/38         | 10      | +              | Gait disturbances                  | ++/++                  | ++/++                   | +         | -                                           | ND        | ND           | ND        | ND           | NA    | c.379A>T (p.Ile127Phe)           | P                   |
| F7-I:2                | F/65         | NA      | +              | None                               | --/--                  | --/--                   | +         | -                                           | 4.9       | 39.2         | 1.3       | 41.5         | 3     | c.379A>T (p.Ile127Phe)           | P                   |
| F8-III:1              | M/36         | 23      | +              | Distal limbs weakness              | ++/++                  | ++/++                   | +         | Nystagmus, gait ataxia                      | 0.3       | 27.3         | 2.3       | 32.1         | 16    | c.403_404insT (p.Tyr135Leufs*12) | P                   |
| F9-II:2               | F/34         | 22      | +              | Unstable walking                   | --/++                  | --/--                   | +         | Recurrent epileptic seizures                | 3.8       | 53.6         | 2.2       | 34.5         | 8     | c.415G>A (p.Val139Met)           | P                   |
| F9-II:1               | F/36         | NA      | +              | Slender limbs                      | ++/++                  | --/--                   | +         | -                                           | 3.5       | 49.7         | 15.2      | 47.6         | 2     | c.415G>A (p.Val139Met)           | P                   |
| F9-I:1                | M/58         | 20      | +              | Distal limbs weakness, foot drop   | ++/++                  | --/--                   | -         | -                                           | ND        | ND           | ND        | ND           | NA    | c.415G>A (p.Val139Met)           | P                   |
| F10-III:6             | M/30         | 15      | +              | Foot deformity                     | --/++                  | --/--                   | +         | Paroxysmal dizziness, abnormal signal of CC | 1.59      | 31.0         | 0.75      | 33.7         | 10    | c.425G>A (p.Arg142Gln)           | P                   |
| F10-III:7             | F/26         | NA      | +              | None                               | --/--                  | --/--                   | +         | -                                           | 4.1       | 31.6         | 3.4       | 42.2         | 5     | c.425G>A (p.Arg142Gln)           | P                   |
| F11-II:2              | F/44         | 33      | +              | Gait difficulty, weakness in legs  | ++/++                  | --/++                   | -         | -                                           | 2.2       | 30.8         | 4.7       | 34.5         | 18    | c.428_430delTGT (p.Leu143del)    | P                   |
| F11-II:1              | F/49         | 45      | +              | Weakness in legs                   | --/++                  | --/--                   | +         | -                                           | ND        | ND           | ND        | ND           | NA    | c.428_430delTGT (p.Leu143del)    | P                   |
| F11-III:2             | F/20         | 19      | +              | Gait disturbance                   | --/++                  | --/--                   | +         | -                                           | ND        | ND           | ND        | ND           | NA    | c.428_430delTGT (p.Leu143del)    | P                   |
| F12-III:2             | M/13         | 11      | +              | Weakness in legs, foot drop        | --/++                  | ++/++                   | -         | -                                           | 0.9       | 28           | 1.34      | 37.9         | 11    | c.533A>G (p.Asp178Gly)           | P                   |
| F13-III:1             | F/36         | 32      | +              | Limbs weakness                     | ++/++                  | ++/++                   | -         | Abnormal WM signal                          | 1.14      | 33.4         | 1.69      | 36.8         | 12    | c.580A>G (p.Met194Val)           | P                   |
| F13-II:3              | M/57         | Early   | +              | Weakness in legs                   | --/++                  | ++/++                   | +         | -                                           | 1.52      | 32.7         | 0.43      | 35.5         | 13    | c.580A>G (p.Met194Val)           | P                   |
| F14-II:1              | M/21         | 11      | +              | Weakness in legs                   | --/++                  | --/--                   | -         | -                                           | 1.83      | 33.9         | 1.39      | 36.4         | 11    | c.590C>T (p.Ala197Val)           | P                   |
| F14-I:2               | F/46         | 42      | +              | Mild lower limb weakness           | --/--                  | ++/++                   | +         | -                                           | 1.5       | 46.8         | 3.3       | 43.3         | 11    | c.590C>T (p.Ala197Val)           | P                   |

All *GJB1* mutations in male patients are hemizygous, and heterozygous in female patients.

AAO, age at onset; ACMG, American College of Medical Genetics and Genomics Standards and Guidelines; BAEPs, brainstem auditory evoked potentials; CC, corpus callosum; CMAP, median compound muscle action potential; CMTNS, Charcot-Marie-Tooth neuropathy score version 2; CNS, central nervous system; early, early childhood; F, female; *GJB1*, gap-junction beta-1 gene; LL, lower limbs; LP, likely pathogenic; M, male; MNCV, median motor nerve conduction velocity; NA, not available; ND, not done; P, pathogenic; SNAP, median sensory nerve action potential; SNCV, median sensory nerve conduction velocity; UL, upper limbs; VUS, variant of uncertain significance; WM, white matter.
