# Supplementary material for: Episodic Neurological Dysfunction in X-Linked Charcot-Marie-Tooth Disease: Expansion of the Phenotypic and Genetic Spectrum
Source: PubMed Central journal article supplement — J Clin Neurol. 2024 Jan 1;20(1):59–66. doi: 10.3988/jcn.2023.0104 (PMC10782082; doi:10.3988/jcn.2023.0104), 2024-01-01
Supplement: jcn-20-59-s002.pdf [file jcn-20-59-s002.pdf]

**Supplementary Table 2.** Prediction results of the six novel *GJB1* mutations in silico analysis

| Mutation                         | Polyphen-2        |       | SIFT       |       | Mutationtaster  |       | CADD       |       |
|----------------------------------|-------------------|-------|------------|-------|-----------------|-------|------------|-------|
|                                  | Prediction        | Score | Prediction | Score | Prediction      | Score | Prediction | Score |
| c.9G>A (p.Trp3*)                 |                   |       |            |       | Disease causing | 1     | Damaging   | 35.0  |
| c.29T>C (p.Leu10Pro)             | Probably damaging | 0.996 | Damaging   | 0.000 | Disease causing | 1     | Damaging   | 24.2  |
| c.59T>C (p.Ile20Thr)             | Probably damaging | 0.994 | Damaging   | 0.027 | Disease causing | 1     | Damaging   | 23.6  |
| c.207C>A (p.Phe69Leu)            | Probably damaging | 1     | Damaging   | 0.001 | Disease causing | 1     | Damaging   | 25.0  |
| c.403_404insT (p.Tyr135Leufs*12) |                   |       |            |       | Disease causing | 1     |            |       |
| c.428_430delTGT (p.Leu143del)    |                   |       |            |       | Disease causing | 1     |            |       |

CADD, Combined Annotation-Dependent Depletion; *GJB1*, gap-junction beta-1 gene; SIFT, sorting intolerant from tolerant
